# Supplementary material for: A two-step quadrature-based variational calculation of ro-vibrational levels and wavefunctions of CO2 using a bisector-x molecule-fixed frame
Source: Royal Society of Chemistry journal article supplement (doi:10.1039/d4cp00655k), 2024-01-01
Supplement: d4cp00655k1.pdf [file d4cp00655k1.pdf]

TABLE I: Calculated  $J = 0$   $A+$  levels (in  $\text{cm}^{-1}$ ) up to  $20000 \text{ cm}^{-1}$ , of  $\text{CO}_2$ , on the AMES-2 PES, using  $(N_{R_1} = N_{R_2}, l_x) = (80, 150)$  and  $(50, 150)$ .  $\Delta_1 = (50, 150) - (80, 150)$ .  $\Delta_2 = \text{Huang2017} - (80, 150)$ .  $\Delta_3 = \text{Huang2022} - (80, 150)$ .

The first level is the ZPE. All other levels are relative to the ZPE. The largest absolute  $\Delta_i$  is in bold face.

| $i$ | (80,150)  | (50,150)  | Huang2017 | Huang2022 | $\Delta_1$ | $\Delta_2$ | $\Delta_3$ |
|-----|-----------|-----------|-----------|-----------|------------|------------|------------|
| 1   | 2535.7993 | 2535.7993 | 2535.7992 | 2535.7992 | 0.0000     | -0.0001    | -0.0001    |
| 2   | 1285.4143 | 1285.4143 | 1285.4144 | 1285.4142 | 0.0000     | 0.0000     | -0.0001    |
| 3   | 1388.1866 | 1388.1866 | 1388.1867 | 1388.1866 | 0.0000     | 0.0001     | 0.0000     |
| 4   | 2548.3662 | 2548.3662 | 2548.3662 | 2548.3659 | 0.0000     | 0.0001     | -0.0003    |
| 5   | 2671.1397 | 2671.1397 | 2671.1397 | 2671.1396 | 0.0000     | 0.0001     | -0.0001    |
| 6   | 2797.1330 | 2797.1330 | 2797.1331 | 2797.1329 | 0.0000     | 0.0001     | -0.0001    |
| 7   | 3792.6790 | 3792.6790 | 3792.6790 | 3792.6786 | 0.0000     | 0.0000     | -0.0004    |
| 8   | 3942.5215 | 3942.5215 | 3942.5216 | 3942.5213 | 0.0000     | 0.0000     | -0.0002    |
| 9   | 4064.2622 | 4064.2622 | 4064.2622 | 4064.2620 | 0.0000     | 0.0001     | -0.0001    |
| 10  | 4225.0924 | 4225.0924 | 4225.0925 | 4225.0922 | 0.0000     | 0.0001     | -0.0002    |
| 11  | 4673.2993 | 4673.2993 | 4673.2994 | 4673.2994 | 0.0000     | 0.0001     | 0.0001     |
| 12  | 5022.3601 | 5022.3601 | 5022.3602 | 5022.3596 | 0.0000     | 0.0000     | -0.0005    |
| 13  | 5197.2335 | 5197.2335 | 5197.2335 | 5197.2331 | 0.0000     | 0.0000     | -0.0003    |
| 14  | 5329.6249 | 5329.6249 | 5329.6249 | 5329.6247 | 0.0000     | 0.0000     | -0.0002    |
| 15  | 5475.5399 | 5475.5399 | 5475.5399 | 5475.5397 | 0.0000     | 0.0000     | -0.0003    |
| 16  | 5667.6396 | 5667.6396 | 5667.6397 | 5667.6394 | 0.0000     | 0.0001     | -0.0003    |
| 17  | 5915.2051 | 5915.2051 | 5915.2053 | 5915.2054 | 0.0000     | 0.0001     | 0.0002     |
| 18  | 6016.7038 | 6016.7038 | 6016.7039 | 6016.7039 | 0.0000     | 0.0001     | 0.0001     |
| 19  | 6240.0951 | 6240.0951 | 6240.0951 | 6240.0944 | 0.0000     | 0.0000     | -0.0006    |
| 20  | 6435.5147 | 6435.5147 | 6435.5146 | 6435.5142 | 0.0000     | 0.0000     | -0.0005    |
| 21  | 6588.3181 | 6588.3181 | 6588.3181 | 6588.3179 | 0.0000     | 0.0000     | -0.0003    |
| 22  | 6725.2608 | 6725.2608 | 6725.2608 | 6725.2605 | 0.0000     | 0.0000     | -0.0003    |
| 23  | 6903.9120 | 6903.9120 | 6903.9120 | 6903.9117 | 0.0000     | 0.0000     | -0.0003    |
| 24  | 7121.7213 | 7121.7213 | 7121.7214 | 7121.7210 | 0.0000     | 0.0001     | -0.0003    |
| 25  | 7133.8057 | 7133.8057 | 7133.8059 | 7133.8061 | 0.0000     | 0.0002     | 0.0004     |
| 26  | 7259.7735 | 7259.7735 | 7259.7736 | 7259.7737 | 0.0000     | 0.0001     | 0.0002     |
| 27  | 7377.7147 | 7377.7147 | 7377.7148 | 7377.7149 | 0.0000     | 0.0001     | 0.0002     |
| 28  | 7447.7049 | 7447.7049 | 7447.7049 | 7447.7042 | 0.0000     | 0.0000     | -0.0007    |
| 29  | 7659.9777 | 7659.9777 | 7659.9776 | 7659.9771 | 0.0000     | 0.0000     | -0.0006    |
| 30  | 7834.8462 | 7834.8462 | 7834.8462 | 7834.8459 | 0.0000     | 0.0000     | -0.0004    |
| 31  | 7974.4252 | 7974.4252 | 7974.4252 | 7974.4249 | 0.0000     | 0.0000     | -0.0003    |
| 32  | 8138.4537 | 8138.4537 | 8138.4537 | 8138.4534 | 0.0000     | 0.0000     | -0.0003    |
| 33  | 8334.2034 | 8334.2034 | 8334.2036 | 8334.2039 | 0.0000     | 0.0002     | 0.0005     |
| 34  | 8345.4709 | 8345.4709 | 8345.4709 | 8345.4705 | 0.0000     | 0.0000     | -0.0004    |
| 35  | 8488.3993 | 8488.3993 | 8488.3994 | 8488.3996 | 0.0000     | 0.0001     | 0.0003     |
| 36  | 8585.2001 | 8585.2001 | 8585.2002 | 8585.1998 | 0.0000     | 0.0001     | -0.0004    |
| 37  | 8607.1538 | 8607.1538 | 8607.1539 | 8607.1540 | 0.0000     | 0.0001     | 0.0002     |
| 38  | 8646.5209 | 8646.5209 | 8646.5208 | 8646.5201 | 0.0000     | -0.0001    | -0.0008    |
| 39  | 8756.7858 | 8756.7858 | 8756.7859 | 8756.7860 | 0.0000     | 0.0001     | 0.0002     |
| 40  | 8872.9699 | 8872.9699 | 8872.9699 | 8872.9693 | 0.0000     | -0.0001    | -0.0007    |
| 41  | 9067.1750 | 9067.1749 | 9067.1749 | 9067.1745 | 0.0000     | 0.0000     | -0.0005    |
| 42  | 9220.2797 | 9220.2797 | 9220.2797 | 9220.2794 | 0.0000     | 0.0000     | -0.0003    |
| 43  | 9246.9304 | 9246.9304 | 9246.9305 | 9246.9302 | 0.0000     | 0.0001     | -0.0002    |
| 44  | 9372.1437 | 9372.1437 | 9372.1437 | 9372.1433 | 0.0000     | 0.0000     | -0.0003    |
| 45  | 9520.5495 | 9520.5495 | 9520.5497 | 9520.5501 | 0.0000     | 0.0002     | 0.0006     |
| 46  | 9567.0143 | 9567.0143 | 9567.0143 | 9567.0139 | 0.0000     | 0.0000     | -0.0004    |
| 47  | 9698.8824 | 9698.8824 | 9698.8825 | 9698.8827 | 0.0000     | 0.0001     | 0.0004     |
| 48  | 9797.3942 | 9797.3942 | 9797.3942 | 9797.3939 | 0.0000     | 0.0000     | -0.0004    |
| 49  | 9833.4278 | 9833.4278 | 9833.4278 | 9833.4279 | 0.0000     | 0.0001     | 0.0002     |
| 50  | 9837.5700 | 9837.5700 | 9837.5698 | 9837.5691 | 0.0000     | -0.0001    | -0.0009    |
| 51  | 9969.2562 | 9969.2562 | 9969.2563 | 9969.2564 | 0.0000     | 0.0001     | 0.0002     |

TABLE I – continued from previous page

| $i$ | (80,150)   | (50,150)   | Huang2017  | Huang2022  | $\Delta_1$ | $\Delta_2$ | $\Delta_3$ |
|-----|------------|------------|------------|------------|------------|------------|------------|
| 52  | 10056.5011 | 10056.5011 | 10056.5012 | 10056.5007 | 0.0000     | 0.0001     | -0.0004    |
| 53  | 10076.1816 | 10076.1816 | 10076.1815 | 10076.1809 | 0.0000     | -0.0001    | -0.0007    |
| 54  | 10150.1249 | 10150.1249 | 10150.1250 | 10150.1251 | 0.0000     | 0.0001     | 0.0002     |
| 55  | 10286.4208 | 10286.4208 | 10286.4208 | 10286.4203 | 0.0000     | -0.0001    | -0.0006    |
| 56  | 10444.8559 | 10444.8559 | 10444.8559 | 10444.8556 | 0.0000     | 0.0000     | -0.0004    |
| 57  | 10458.1003 | 10458.1003 | 10458.1003 | 10458.0999 | 0.0000     | 0.0000     | -0.0004    |
| 58  | 10546.6141 | 10546.6140 | 10546.6140 | 10546.6138 | 0.0000     | 0.0000     | -0.0003    |
| 59  | 10605.5455 | 10605.5455 | 10605.5456 | 10605.5452 | 0.0000     | 0.0000     | -0.0003    |
| 60  | 10695.3981 | 10695.3981 | 10695.3983 | 10695.3988 | 0.0000     | 0.0002     | 0.0006     |
| 61  | 10786.8122 | 10786.8122 | 10786.8122 | 10786.8119 | 0.0000     | 0.0000     | -0.0004    |
| 62  | 10893.0974 | 10893.0974 | 10893.0976 | 10893.0978 | 0.0000     | 0.0002     | 0.0004     |
| 63  | 11007.2872 | 11007.2872 | 11007.2872 | 11007.2868 | 0.0000     | 0.0000     | -0.0004    |
| 64  | 11021.6712 | 11021.6711 | 11021.6710 | 11021.6702 | 0.0000     | -0.0002    | -0.0009    |
| 65  | 11050.1946 | 11050.1946 | 11050.1947 | 11050.1948 | 0.0000     | 0.0001     | 0.0002     |
| 66  | 11181.2835 | 11181.2835 | 11181.2836 | 11181.2836 | 0.0000     | 0.0001     | 0.0001     |
| 67  | 11257.9202 | 11257.9203 | 11257.9202 | 11257.9198 | 0.0000     | 0.0000     | -0.0004    |
| 68  | 11270.8505 | 11270.8505 | 11270.8504 | 11270.8497 | 0.0000     | -0.0001    | -0.0008    |
| 69  | 11347.8941 | 11347.8941 | 11347.8941 | 11347.8943 | 0.0000     | 0.0001     | 0.0002     |
| 70  | 11494.5031 | 11494.5031 | 11494.5030 | 11494.5024 | 0.0000     | -0.0001    | -0.0006    |
| 71  | 11532.4798 | 11532.4798 | 11532.4798 | 11532.4794 | 0.0000     | 0.0001     | -0.0003    |
| 72  | 11556.2604 | 11556.2604 | 11556.2605 | 11556.2605 | 0.0000     | 0.0001     | 0.0001     |
| 73  | 11619.0792 | 11619.0792 | 11619.0791 | 11619.0787 | 0.0000     | -0.0001    | -0.0005    |
| 74  | 11684.4371 | 11684.4371 | 11684.4371 | 11684.4367 | 0.0000     | 0.0000     | -0.0004    |
| 75  | 11749.3744 | 11749.3744 | 11749.3743 | 11749.3740 | 0.0000     | -0.0001    | -0.0004    |
| 76  | 11837.6392 | 11837.6392 | 11837.6392 | 11837.6388 | 0.0000     | 0.0000     | -0.0003    |
| 77  | 11860.5275 | 11860.5275 | 11860.5278 | 11860.5282 | 0.0000     | 0.0002     | 0.0007     |
| 78  | 11860.5954 | 11860.5954 | 11860.5953 | 11860.5950 | 0.0000     | 0.0000     | -0.0004    |
| 79  | 12005.4208 | 12005.4208 | 12005.4208 | 12005.4204 | 0.0000     | 0.0000     | -0.0004    |
| 80  | 12074.0752 | 12074.0752 | 12074.0754 | 12074.0757 | 0.0000     | 0.0002     | 0.0005     |
| 81  | 12199.4922 | 12199.4921 | 12199.4919 | 12199.4912 | 0.0000     | -0.0002    | -0.0010    |
| 82  | 12215.0510 | 12215.0510 | 12215.0510 | 12215.0506 | 0.0000     | 0.0000     | -0.0004    |
| 83  | 12252.7246 | 12252.7246 | 12252.7247 | 12252.7249 | 0.0000     | 0.0001     | 0.0002     |
| 84  | 12391.8858 | 12391.8858 | 12391.8859 | 12391.8859 | 0.0000     | 0.0001     | 0.0001     |
| 85  | 12457.0380 | 12457.0380 | 12457.0380 | 12457.0376 | 0.0000     | 0.0000     | -0.0004    |
| 86  | 12457.9279 | 12457.9279 | 12457.9278 | 12457.9271 | 0.0000     | -0.0001    | -0.0008    |
| 87  | 12544.1452 | 12544.1452 | 12544.1453 | 12544.1454 | 0.0000     | 0.0001     | 0.0001     |
| 88  | 12693.0207 | 12693.0207 | 12693.0206 | 12693.0200 | 0.0000     | -0.0001    | -0.0007    |
| 89  | 12723.4363 | 12723.4363 | 12723.4363 | 12723.4360 | 0.0000     | 0.0000     | -0.0004    |
| 90  | 12741.2170 | 12741.2170 | 12741.2171 | 12741.2171 | 0.0000     | 0.0000     | 0.0001     |
| 91  | 12775.8084 | 12775.8084 | 12775.8083 | 12775.8078 | 0.0000     | -0.0002    | -0.0006    |
| 92  | 12898.6710 | 12898.6710 | 12898.6710 | 12898.6705 | 0.0000     | 0.0000     | -0.0005    |
| 93  | 12934.6942 | 12934.6942 | 12934.6941 | 12934.6937 | 0.0000     | -0.0001    | -0.0005    |
| 94  | 12965.1642 | 12965.1642 | 12965.1643 | 12965.1643 | 0.0000     | 0.0001     | 0.0001     |
| 95  | 13017.2095 | 13017.2094 | 13017.2097 | 13017.2102 | 0.0000     | 0.0002     | 0.0007     |
| 96  | 13019.9316 | 13019.9316 | 13019.9317 | 13019.9312 | 0.0000     | 0.0001     | -0.0004    |
| 97  | 13052.7610 | 13052.7610 | 13052.7609 | 13052.7605 | 0.0000     | 0.0000     | -0.0004    |
| 98  | 13065.3121 | 13065.3121 | 13065.3121 | 13065.3118 | 0.0000     | 0.0000     | -0.0003    |
| 99  | 13191.5128 | 13191.5127 | 13191.5127 | 13191.5123 | 0.0000     | -0.0001    | -0.0005    |
| 100 | 13223.3930 | 13223.3930 | 13223.3930 | 13223.3927 | 0.0000     | 0.0000     | -0.0003    |
| 101 | 13244.1221 | 13244.1221 | 13244.1223 | 13244.1227 | 0.0000     | 0.0002     | 0.0005     |
| 102 | 13371.5854 | 13371.5853 | 13371.5851 | 13371.5844 | 0.0000     | -0.0002    | -0.0010    |
| 103 | 13420.8904 | 13420.8904 | 13420.8904 | 13420.8900 | 0.0000     | 0.0000     | -0.0004    |
| 104 | 13440.7311 | 13440.7311 | 13440.7312 | 13440.7314 | 0.0000     | 0.0001     | 0.0003     |
| 105 | 13596.7833 | 13596.7833 | 13596.7834 | 13596.7834 | 0.0000     | 0.0001     | 0.0001     |
| 106 | 13638.1719 | 13638.1719 | 13638.1718 | 13638.1710 | 0.0000     | -0.0002    | -0.0009    |
| 107 | 13653.8858 | 13653.8858 | 13653.8857 | 13653.8853 | 0.0000     | 0.0000     | -0.0004    |

TABLE I – continued from previous page

| $i$ | (80,150)   | (50,150)   | Huang2017  | Huang2022  | $\Delta_1$ | $\Delta_2$ | $\Delta_3$ |
|-----|------------|------------|------------|------------|------------|------------|------------|
| 108 | 13721.1470 | 13721.1471 | 13721.1473 | 13721.1470 | 0.0000     | 0.0003     | -0.0001    |
| 109 | 13739.7659 | 13739.7659 | 13739.7659 | 13739.7659 | 0.0000     | 0.0000     | 0.0000     |
| 110 | 13883.1633 | 13883.1633 | 13883.1632 | 13883.1626 | 0.0000     | -0.0001    | -0.0007    |
| 111 | 13912.1295 | 13912.1295 | 13912.1295 | 13912.1291 | 0.0000     | 0.0000     | -0.0003    |
| 112 | 13918.7908 | 13918.7908 | 13918.7906 | 13918.7901 | 0.0000     | -0.0002    | -0.0007    |
| 113 | 13924.2466 | 13924.2466 | 13924.2467 | 13924.2466 | 0.0000     | 0.0000     | 0.0000     |
| 114 | 14100.9878 | 14100.9878 | 14100.9877 | 14100.9872 | 0.0000     | -0.0001    | -0.0006    |
| 115 | 14101.9378 | 14101.9378 | 14101.9378 | 14101.9373 | 0.0000     | -0.0001    | -0.0006    |
| 116 | 14138.9974 | 14138.9973 | 14138.9974 | 14138.9975 | 0.0000     | 0.0000     | 0.0001     |
| 117 | 14166.5082 | 14166.5082 | 14166.5084 | 14166.5089 | 0.0000     | 0.0002     | 0.0007     |
| 118 | 14200.2781 | 14200.2781 | 14200.2781 | 14200.2777 | 0.0000     | 0.0000     | -0.0004    |
| 119 | 14239.6133 | 14239.6133 | 14239.6133 | 14239.6128 | 0.0000     | 0.0000     | -0.0005    |
| 120 | 14284.7961 | 14284.7961 | 14284.7961 | 14284.7957 | 0.0000     | 0.0000     | -0.0004    |
| 121 | 14366.1646 | 14366.1646 | 14366.1646 | 14366.1641 | 0.0000     | 0.0000     | -0.0005    |
| 122 | 14386.1154 | 14386.1154 | 14386.1154 | 14386.1155 | 0.0000     | 0.0000     | 0.0001     |
| 123 | 14404.7386 | 14404.7386 | 14404.7388 | 14404.7392 | 0.0000     | 0.0002     | 0.0005     |
| 124 | 14440.8334 | 14440.8334 | 14440.8334 | 14440.8331 | 0.0000     | 0.0000     | -0.0003    |
| 125 | 14507.4955 | 14507.4955 | 14507.4955 | 14507.4950 | 0.0000     | 0.0000     | -0.0004    |
| 126 | 14536.7037 | 14536.7037 | 14536.7037 | 14536.7032 | 0.0000     | -0.0001    | -0.0006    |
| 127 | 14538.4127 | 14538.4127 | 14538.4125 | 14538.4117 | 0.0000     | -0.0002    | -0.0010    |
| 128 | 14615.8688 | 14615.8688 | 14615.8690 | 14615.8692 | 0.0000     | 0.0001     | 0.0003     |
| 129 | 14625.4370 | 14625.4370 | 14625.4370 | 14625.4367 | 0.0000     | 0.0000     | -0.0004    |
| 130 | 14791.2110 | 14791.2110 | 14791.2110 | 14791.2110 | 0.0000     | 0.0001     | 0.0001     |
| 131 | 14812.2011 | 14812.2010 | 14812.2009 | 14812.2002 | 0.0000     | -0.0002    | -0.0009    |
| 132 | 14848.4843 | 14848.4843 | 14848.4843 | 14848.4839 | 0.0000     | 0.0000     | -0.0004    |
| 133 | 14874.6940 | 14874.6940 | 14874.6942 | 14874.6938 | 0.0000     | 0.0002     | -0.0001    |
| 134 | 14934.7219 | 14934.7219 | 14934.7219 | 14934.7218 | 0.0000     | 0.0000     | -0.0001    |
| 135 | 14978.2903 | 14978.2903 | 14978.2905 | 14978.2903 | 0.0000     | 0.0002     | 0.0000     |
| 136 | 15051.2391 | 15051.2390 | 15051.2389 | 15051.2382 | 0.0000     | -0.0002    | -0.0009    |
| 137 | 15065.8332 | 15065.8332 | 15065.8331 | 15065.8324 | 0.0000     | -0.0001    | -0.0008    |
| 138 | 15098.6717 | 15098.6717 | 15098.6717 | 15098.6714 | 0.0000     | 0.0000     | -0.0003    |
| 139 | 15104.9550 | 15104.9550 | 15104.9551 | 15104.9549 | 0.0000     | 0.0000     | -0.0001    |
| 140 | 15251.5754 | 15251.5754 | 15251.5753 | 15251.5747 | 0.0000     | -0.0001    | -0.0007    |
| 141 | 15295.6674 | 15295.6673 | 15295.6673 | 15295.6668 | 0.0000     | -0.0001    | -0.0006    |
| 142 | 15309.2089 | 15309.2089 | 15309.2091 | 15309.2097 | 0.0000     | 0.0002     | 0.0008     |
| 143 | 15310.2792 | 15310.2792 | 15310.2792 | 15310.2792 | 0.0000     | 0.0000     | 0.0000     |
| 144 | 15378.4311 | 15378.4311 | 15378.4311 | 15378.4307 | 0.0000     | 0.0000     | -0.0004    |
| 145 | 15413.8895 | 15413.8895 | 15413.8895 | 15413.8889 | 0.0000     | 0.0000     | -0.0006    |
| 146 | 15493.9172 | 15493.9172 | 15493.9172 | 15493.9168 | 0.0000     | 0.0000     | -0.0004    |
| 147 | 15539.0881 | 15539.0881 | 15539.0882 | 15539.0877 | 0.0000     | 0.0001     | -0.0004    |
| 148 | 15551.1110 | 15551.1110 | 15551.1110 | 15551.1109 | 0.0000     | 0.0001     | -0.0001    |
| 149 | 15557.2776 | 15557.2776 | 15557.2778 | 15557.2782 | 0.0000     | 0.0002     | 0.0006     |
| 150 | 15656.1623 | 15656.1623 | 15656.1623 | 15656.1620 | 0.0000     | 0.0000     | -0.0003    |
| 151 | 15678.1369 | 15678.1369 | 15678.1369 | 15678.1365 | 0.0000     | 0.0000     | -0.0004    |
| 152 | 15696.6314 | 15696.6314 | 15696.6315 | 15696.6308 | 0.0000     | 0.0001     | -0.0006    |
| 153 | 15700.3637 | 15700.3637 | 15700.3635 | 15700.3627 | 0.0000     | -0.0002    | -0.0010    |
| 154 | 15780.8227 | 15780.8227 | 15780.8228 | 15780.8230 | 0.0000     | 0.0001     | 0.0003     |
| 155 | 15809.4562 | 15809.4562 | 15809.4562 | 15809.4561 | 0.0000     | 0.0001     | 0.0000     |
| 156 | 15828.3955 | 15828.3955 | 15828.3955 | 15828.3952 | 0.0000     | 0.0000     | -0.0003    |
| 157 | 15894.3086 | 15894.3086 | 15894.3086 | 15894.3080 | 0.0000     | 0.0001     | -0.0006    |
| 158 | 15973.0786 | 15973.0786 | 15973.0786 | 15973.0787 | 0.0000     | 0.0001     | 0.0001     |
| 159 | 15980.5277 | 15980.5277 | 15980.5276 | 15980.5268 | 0.0000     | -0.0001    | -0.0009    |
| 160 | 15999.3235 | 15999.3235 | 15999.3235 | 15999.3231 | 0.0000     | 0.0001     | -0.0004    |
| 161 | 16004.6236 | 16004.6236 | 16004.6239 | 16004.6235 | 0.0000     | 0.0002     | -0.0001    |
| 162 | 16040.9180 | 16040.9180 | 16040.9180 | 16040.9176 | 0.0000     | 0.0000     | -0.0004    |
| 163 | 16126.7331 | 16126.7331 | 16126.7332 | 16126.7330 | 0.0000     | 0.0000     | -0.0001    |

TABLE I – continued from previous page

| $i$ | (80,150)   | (50,150)   | Huang2017  | Huang2022  | $\Delta_1$ | $\Delta_2$ | $\Delta_3$ |
|-----|------------|------------|------------|------------|------------|------------|------------|
| 164 | 16140.1622 | 16140.1622 | 16140.1626 | 16140.1622 | 0.0000     | 0.0004     | 0.0000     |
| 165 | 16174.2676 | 16174.2676 | 16174.2674 | 16174.2666 | 0.0000     | -0.0002    | -0.0010    |
| 166 | 16241.7390 | 16241.7390 | 16241.7389 | 16241.7382 | 0.0000     | -0.0001    | -0.0008    |
| 167 | 16246.3957 | 16246.3957 | 16246.3962 | 16246.3958 | 0.0000     | 0.0005     | 0.0001     |
| 168 | 16282.3821 | 16282.3821 | 16282.3822 | 16282.3819 | 0.0000     | 0.0001     | -0.0002    |
| 169 | 16285.1721 | 16285.1721 | 16285.1721 | 16285.1718 | 0.0000     | 0.0000     | -0.0003    |
| 170 | 16389.6167 | 16389.6167 | 16389.6167 | 16389.6159 | 0.0000     | 0.0000     | -0.0008    |
| 171 | 16445.9633 | 16445.9633 | 16445.9634 | 16445.9640 | 0.0000     | 0.0001     | 0.0007     |
| 172 | 16479.1624 | 16479.1624 | 16479.1625 | 16479.1624 | 0.0000     | 0.0001     | -0.0001    |
| 173 | 16481.0405 | 16481.0405 | 16481.0405 | 16481.0399 | 0.0000     | -0.0001    | -0.0006    |
| 174 | 16554.3085 | 16554.3085 | 16554.3086 | 16554.3082 | 0.0000     | 0.0000     | -0.0004    |
| 175 | 16572.4843 | 16572.4843 | 16572.4846 | 16572.4836 | 0.0000     | 0.0003     | -0.0007    |
| 176 | 16692.4017 | 16692.4017 | 16692.4017 | 16692.4012 | 0.0000     | 0.0000     | -0.0005    |
| 177 | 16702.6718 | 16702.6718 | 16702.6719 | 16702.6723 | 0.0000     | 0.0001     | 0.0005     |
| 178 | 16704.8048 | 16704.8048 | 16704.8051 | 16704.8046 | 0.0000     | 0.0003     | -0.0002    |
| 179 | 16717.8652 | 16717.8652 | 16717.8658 | 16717.8648 | 0.0000     | 0.0005     | -0.0004    |
| 180 | 16846.3199 | 16846.3199 | 16846.3200 | 16846.3196 | 0.0000     | 0.0000     | -0.0004    |
| 181 | 16855.5687 | 16855.5687 | 16855.5696 | 16855.5682 | 0.0000     | 0.0009     | -0.0006    |
| 182 | 16857.7685 | 16857.7686 | 16857.7683 | 16857.7675 | 0.0001     | -0.0002    | -0.0011    |
| 183 | 16866.6581 | 16866.6581 | 16866.6581 | 16866.6578 | 0.0000     | 0.0000     | -0.0003    |
| 184 | 16936.6149 | 16936.6149 | 16936.6150 | 16936.6153 | 0.0000     | 0.0001     | 0.0003     |
| 185 | 16962.6204 | 16962.6204 | 16962.6207 | 16962.6204 | 0.0000     | 0.0003     | -0.0001    |
| 186 | 17030.5463 | 17030.5463 | 17030.5464 | 17030.5461 | 0.0000     | 0.0000     | -0.0003    |
| 187 | 17040.6095 | 17040.6095 | 17040.6105 | 17040.6090 | 0.0000     | 0.0009     | -0.0006    |
| 188 | 17117.8709 | 17117.8709 | 17117.8713 | 17117.8708 | 0.0000     | 0.0004     | -0.0001    |
| 189 | 17143.0018 | 17143.0018 | 17143.0019 | 17143.0019 | 0.0000     | 0.0001     | 0.0001     |
| 190 | 17143.5814 | 17143.5815 | 17143.5813 | 17143.5805 | 0.0000     | -0.0001    | -0.0009    |
| 191 | 17159.7094 | 17159.7094 | 17159.7094 | 17159.7090 | 0.0000     | 0.0000     | -0.0004    |
| 192 | 17226.0328 | 17226.0328 | 17226.0337 | 17226.0325 | 0.0000     | 0.0008     | -0.0003    |
| 193 | 17231.3279 | 17231.3279 | 17231.3279 | 17231.3275 | 0.0000     | 0.0000     | -0.0003    |
| 194 | 17272.4841 | 17272.4841 | 17272.4845 | 17272.4838 | 0.0000     | 0.0004     | -0.0003    |
| 195 | 17282.1828 | 17282.1828 | 17282.1840 | 17282.1828 | 0.0000     | 0.0012     | 0.0000     |
| 196 | 17289.1157 | 17289.1156 | 17289.1155 | 17289.1146 | 0.0000     | -0.0002    | -0.0011    |
| 197 | 17312.1468 | 17312.1468 | 17312.1470 | 17312.1467 | 0.0000     | 0.0002     | -0.0002    |
| 198 | 17401.5151 | 17401.5151 | 17401.5172 | 17401.5152 | 0.0000     | 0.0022     | 0.0001     |
| 199 | 17411.4514 | 17411.4515 | 17411.4513 | 17411.4506 | 0.0000     | -0.0001    | -0.0008    |
| 200 | 17461.4023 | 17461.4023 | 17461.4026 | 17461.4021 | 0.0000     | 0.0003     | -0.0002    |
| 201 | 17466.8578 | 17466.8578 | 17466.8578 | 17466.8574 | 0.0000     | 0.0001     | -0.0004    |
| 202 | 17494.1579 | 17494.1579 | 17494.1579 | 17494.1575 | 0.0000     | 0.0001     | -0.0004    |
| 203 | 17517.3060 | 17517.3060 | 17517.3062 | 17517.3051 | 0.0000     | 0.0002     | -0.0009    |
| 204 | 17529.9573 | 17529.9573 | 17529.9597 | 17529.9574 | 0.0000     | 0.0024     | 0.0001     |
| 205 | 17577.3233 | 17577.3233 | 17577.3234 | 17577.3240 | 0.0000     | 0.0001     | 0.0007     |
| 206 | 17645.8476 | 17645.8475 | 17645.8479 | 17645.8474 | 0.0000     | 0.0004     | -0.0002    |
| 207 | 17658.9304 | 17658.9304 | 17658.9304 | 17658.9298 | 0.0000     | -0.0001    | -0.0007    |
| 208 | 17716.7410 | 17716.7410 | 17716.7422 | 17716.7402 | 0.0000     | 0.0012     | -0.0008    |
| 209 | 17727.8728 | 17727.8728 | 17727.8728 | 17727.8724 | 0.0000     | 0.0000     | -0.0004    |
| 210 | 17841.3059 | 17841.3059 | 17841.3060 | 17841.3065 | 0.0000     | 0.0001     | 0.0006     |
| 211 | 17863.8101 | 17863.8101 | 17863.8111 | 17863.8099 | 0.0000     | 0.0010     | -0.0002    |
| 212 | 17880.2759 | 17880.2759 | 17880.2784 | 17880.2753 | 0.0000     | 0.0025     | -0.0005    |
| 213 | 17881.5273 | 17881.5273 | 17881.5272 | 17881.5268 | 0.0000     | 0.0000     | -0.0005    |
| 214 | 18010.9089 | 18010.9094 | 18010.9087 | 18010.9078 | 0.0005     | -0.0002    | -0.0011    |
| 215 | 18011.4164 | 18011.4164 | 18011.4173 | 18011.4161 | 0.0000     | 0.0009     | -0.0004    |
| 216 | 18014.6906 | 18014.6906 | 18014.6939 | 18014.6901 | 0.0000     | 0.0033     | -0.0005    |
| 217 | 18069.0493 | 18069.0493 | 18069.0493 | 18069.0490 | 0.0000     | 0.0000     | -0.0003    |
| 218 | 18084.8853 | 18084.8853 | 18084.8854 | 18084.8856 | 0.0000     | 0.0002     | 0.0003     |
| 219 | 18096.3556 | 18096.3556 | 18096.3569 | 18096.3560 | 0.0000     | 0.0013     | 0.0004     |

TABLE I – continued from previous page

| $i$ | (80,150)   | (50,150)   | Huang2017  | Huang2022  | $\Delta_1$    | $\Delta_2$ | $\Delta_3$     |
|-----|------------|------------|------------|------------|---------------|------------|----------------|
| 220 | 18113.6702 | 18113.6702 | 18113.6711 | 18113.6700 | 0.0000        | 0.0009     | -0.0001        |
| 221 | 18184.7554 | 18184.7554 | 18184.7598 | 18184.7549 | 0.0000        | 0.0044     | -0.0006        |
| 222 | 18218.3868 | 18218.3868 | 18218.3880 | 18218.3867 | 0.0000        | 0.0012     | -0.0001        |
| 223 | 18231.4266 | 18231.4266 | 18231.4267 | 18231.4264 | 0.0000        | 0.0001     | -0.0002        |
| 224 | 18301.7239 | 18301.7241 | 18301.7238 | 18301.7229 | 0.0002        | -0.0001    | -0.0010        |
| 225 | 18302.6226 | 18302.6225 | 18302.6230 | 18302.6227 | 0.0000        | 0.0004     | 0.0001         |
| 226 | 18316.8033 | 18316.8034 | 18316.8035 | 18316.8030 | 0.0000        | 0.0002     | -0.0003        |
| 227 | 18369.6187 | 18369.6187 | 18369.6228 | 18369.6183 | 0.0000        | 0.0041     | -0.0003        |
| 228 | 18397.1922 | 18397.1922 | 18397.1921 | 18397.1910 | 0.0000        | -0.0001    | <b>-0.0012</b> |
| 229 | 18403.0034 | 18403.0034 | 18403.0073 | 18403.0034 | 0.0000        | 0.0039     | 0.0000         |
| 230 | 18409.3918 | 18409.3918 | 18409.3949 | 18409.3915 | 0.0000        | 0.0032     | -0.0003        |
| 231 | 18419.8149 | 18419.8148 | 18419.8149 | 18419.8145 | 0.0000        | 0.0000     | -0.0003        |
| 232 | 18487.5212 | 18487.5212 | 18487.5222 | 18487.5210 | 0.0000        | 0.0010     | -0.0002        |
| 233 | 18548.2276 | 18548.2276 | 18548.2379 | 18548.2278 | 0.0000        | 0.0103     | 0.0002         |
| 234 | 18575.4324 | 18575.4325 | 18575.4323 | 18575.4315 | 0.0001        | -0.0001    | -0.0008        |
| 235 | 18609.5092 | 18609.5092 | 18609.5160 | 18609.5087 | 0.0000        | 0.0068     | -0.0005        |
| 236 | 18634.2712 | 18634.2712 | 18634.2722 | 18634.2705 | 0.0000        | 0.0011     | -0.0007        |
| 237 | 18639.0736 | 18639.0735 | 18639.0746 | 18639.0730 | 0.0000        | 0.0010     | -0.0005        |
| 238 | 18643.9235 | 18643.9235 | 18643.9238 | 18643.9232 | 0.0000        | 0.0003     | -0.0003        |
| 239 | 18647.8028 | 18647.8028 | 18647.8033 | 18647.8024 | 0.0000        | 0.0005     | -0.0004        |
| 240 | 18669.5257 | 18669.5257 | 18669.5403 | 18669.5260 | 0.0000        | 0.0146     | 0.0002         |
| 241 | 18694.9169 | 18694.9169 | 18694.9176 | 18694.9167 | 0.0000        | 0.0007     | -0.0003        |
| 242 | 18703.7408 | 18703.7408 | 18703.7409 | 18703.7415 | 0.0001        | 0.0001     | 0.0007         |
| 243 | 18810.5412 | 18810.5412 | 18810.5430 | 18810.5410 | 0.0000        | 0.0018     | -0.0002        |
| 244 | 18827.8109 | 18827.8108 | 18827.8249 | 18827.8111 | 0.0000        | 0.0140     | 0.0002         |
| 245 | 18830.0046 | 18830.0046 | 18830.0045 | 18830.0039 | 0.0000        | 0.0000     | -0.0007        |
| 246 | 18849.2783 | 18849.2783 | 18849.2818 | 18849.2775 | 0.0000        | 0.0035     | -0.0008        |
| 247 | 18898.8979 | 18898.8979 | 18898.8981 | 18898.8976 | 0.0000        | 0.0002     | -0.0003        |
| 248 | 18974.2584 | 18974.2583 | 18974.2585 | 18974.2589 | 0.0000        | 0.0002     | 0.0005         |
| 249 | 18991.3336 | 18991.3336 | 18991.3336 | 18991.3332 | 0.0000        | 0.0001     | -0.0004        |
| 250 | 19018.9199 | 19018.9199 | 19018.9241 | 19018.9196 | 0.0000        | 0.0042     | -0.0003        |
| 251 | 19031.5755 | 19031.5755 | 19031.5833 | 19031.5749 | 0.0000        | 0.0079     | -0.0005        |
| 252 | 19061.8931 | 19061.8932 | 19061.8931 | 19061.8926 | 0.0000        | 0.0000     | -0.0006        |
| 253 | 19160.0253 | 19160.0269 | 19160.0252 | 19160.0242 | <b>0.0016</b> | -0.0001    | -0.0011        |
| 254 | 19170.6356 | 19170.6356 | 19170.6503 | 19170.6352 | 0.0000        | 0.0147     | -0.0004        |
| 255 | 19175.3528 | 19175.3528 | 19175.3555 | 19175.3524 | 0.0000        | 0.0027     | -0.0004        |
| 256 | 19205.1620 | 19205.1621 | 19205.1669 | 19205.1626 | 0.0000        | 0.0048     | 0.0005         |
| 257 | 19224.6357 | 19224.6357 | 19224.6361 | 19224.6360 | 0.0000        | 0.0004     | 0.0003         |
| 258 | 19262.5689 | 19262.5689 | 19262.5720 | 19262.5687 | 0.0000        | 0.0031     | -0.0003        |
| 259 | 19263.5764 | 19263.5764 | 19263.5765 | 19263.5760 | 0.0000        | 0.0001     | -0.0004        |
| 260 | 19308.0099 | 19308.0099 | 19308.0137 | 19308.0098 | 0.0000        | 0.0038     | -0.0001        |
| 261 | 19312.2196 | 19312.2196 | 19312.2333 | 19312.2200 | 0.0000        | 0.0138     | 0.0005         |
| 262 | 19328.0446 | 19328.0446 | 19328.0621 | 19328.0441 | 0.0000        | 0.0175     | -0.0004        |
| 263 | 19428.8733 | 19428.8733 | 19428.8735 |            | 0.0000        | 0.0002     |                |
| 264 | 19454.2133 | 19454.2133 | 19454.2145 |            | 0.0000        | 0.0012     |                |
| 265 | 19455.2644 | 19455.2653 | 19455.2643 |            | 0.0009        | -0.0001    |                |
| 266 | 19469.4725 | 19469.4725 | 19469.4738 |            | 0.0000        | 0.0013     |                |
| 267 | 19499.0166 | 19499.0166 | 19499.0170 |            | 0.0000        | 0.0004     |                |
| 268 | 19508.5978 | 19508.5978 | 19508.6146 |            | 0.0000        | 0.0168     |                |
| 269 | 19515.0266 | 19515.0266 | 19515.0435 |            | 0.0000        | 0.0169     |                |
| 270 | 19541.7570 | 19541.7570 | 19541.7637 |            | 0.0000        | 0.0067     |                |
| 271 | 19606.1913 | 19606.1913 | 19606.1916 |            | 0.0000        | 0.0003     |                |
| 272 | 19652.5446 | 19652.5446 | 19652.5481 |            | 0.0000        | 0.0035     |                |
| 273 | 19679.3396 | 19679.3396 | 19679.3830 |            | 0.0000        | 0.0434     |                |
| 274 | 19734.0400 | 19734.0405 | 19734.0399 |            | 0.0005        | 0.0000     |                |
| 275 | 19738.2487 | 19738.2487 | 19738.2759 |            | 0.0000        | 0.0272     |                |

TABLE I – continued from previous page

| $i$ | (80,150)   | (50,150)   | Huang2017  | Huang2022 | $\Delta_1$ | $\Delta_2$    | $\Delta_3$ |
|-----|------------|------------|------------|-----------|------------|---------------|------------|
| 276 | 19746.9958 | 19746.9958 | 19746.9985 |           | 0.0000     | 0.0027        |            |
| 277 | 19785.5860 | 19785.5860 | 19785.5889 |           | 0.0000     | 0.0029        |            |
| 278 | 19808.6925 | 19808.6925 | 19808.7596 |           | 0.0000     | 0.0671        |            |
| 279 | 19809.3701 | 19809.3701 | 19809.3749 |           | 0.0000     | 0.0048        |            |
| 280 | 19825.6232 | 19825.6235 | 19825.6233 |           | 0.0004     | 0.0001        |            |
| 281 | 19826.4285 | 19826.4284 | 19826.4307 |           | 0.0000     | 0.0022        |            |
| 282 | 19829.6028 | 19829.6028 | 19829.6062 |           | 0.0000     | 0.0034        |            |
| 283 | 19949.5100 | 19949.5100 | 19949.5855 |           | 0.0000     | <b>0.0755</b> |            |
| 284 | 19969.9551 | 19969.9551 | 19969.9654 |           | 0.0000     | 0.0102        |            |
| 285 | 19975.4813 | 19975.4813 | 19975.4889 |           | 0.0000     | 0.0076        |            |
| 286 | 19988.2546 | 19988.2546 | 19988.2954 |           | 0.0000     | 0.0409        |            |
| 287 | 19994.7367 | 19994.7370 | 19994.7367 |           | 0.0003     | 0.0000        |            |
